# Supplementary material for: The Effect of Yoga on Health-Related Fitness among Patients with Type 2 Diabetes Mellitus: A Systematic Review and Meta-Analysis
Source: MDPI journal article supplement (doi:10.3390/ijerph19074199), 2022-04-01
Supplement: s1 [file s1]

Search Strategy for Pubmed:

(YOGA OR YOGA[MeSH Terms] OR mind body exercise[Mesh terms] OR YOGIC) AND (NIDDM OR Diabetes Mellitus, Type 2[MeSH Terms] OR Diabetic)

Search Strategy for Scopus:

(TITLE-ABS-KEY(YOGA OR YOGIC OR YOGI OR (MIND-BODY AND EXERCISE) OR (MIND AND BODY AND EXERCISE)) AND TITLE-ABS-KEY(DIABETES OR NIDDM OR DIABETIC))

Search Strategy for Cochrane:

(YOGA OR YOGIC OR YOGI OR (MIND-BODY AND EXERCISE) OR (MIND AND BODY AND EXERCISE)) AND (DIABETES OR NIDDM OR DIABET OR DIABETIC)

Search Strategy for Embase

1= yoga/

2= mind-body therapies

3= (yoga or yogi or yogic).mp

4= Diabetes Mellitus, Type 2/

5= (NIDDM or diabetes or diabet or diabetic).mp

6= 1 or 2 or 3

7= 4 or 5

8= 6 and 7
