# Supplementary material for: The Effect of Yoga on Health-Related Fitness among Patients with Type 2 Diabetes Mellitus: A Systematic Review and Meta-Analysis
Source: Int J Environ Res Public Health. 2022 Apr 1;19(7):4199. doi: 10.3390/ijerph19074199 (PMC8998732; doi:10.3390/ijerph19074199)
Supplement: Supplementary file 1 [file ijerph-19-04199-s001.zip › Supplement file 2 Blank Data Extraction Form SysRev Yoga 22112022.xlsx]

## Sheet: Sheet1
No.	General Items					Method+F1:R2F1:R4F1:R7F1:R8													Intervention																							Outcomes
	Author(s)	Title	Fulltext	Funding source(s)		Design						Participants							Intervention 1							Intervention 2							Intervention 3							Control		Cardiorespiratory fitness
						Study design	Objective of the study		Duration of the intervention	Study location (country)	date of study	Inclusion criteria	Exclusion criteria	# of sample	Age	Gender	Weight Status	Other sociodemographic informations	Frequency and length of sessions	Intervention duration	Intervention setting	Intervention provider	Mode of delivery	Yoga type	Co-intervention	Frequency and length of sessions	Intervention duration	Intervention setting	Intervention provider	Mode of delivery	Type of intervention	Co-intervention	Frequency and length of sessions	Intervention duration	Intervention setting	Intervention provider	Mode of delivery	Type of intervention	Co-intervention	Type of control	Additional information	Type of measurement		Measurement unit			Baseline Mean (SD)
						RCT/Non-RCT																																								n	Intervention 1	n	Intervention 2
[truncated: 180 more columns]
